# Supplementary material for: Dietary Linolenic Acid Increases Sensitizing and Eliciting Capacities of Cow’s Milk Whey Proteins in BALB/c Mice
Source: Nutrients. 2022 Feb 16;14(4):822. doi: 10.3390/nu14040822 (PMC8877816; doi:10.3390/nu14040822)
Supplement: Supplementary file 1 [file nutrients-14-00822-s001.zip › nutrients-1576482-supplementary.pdf]

## Supplementary Data

**Table S1.** The scoring table of anaphylactic symptoms.

| Score | Symptoms                                                                        |
|-------|---------------------------------------------------------------------------------|
| 0     | No symptoms                                                                     |
| 1     | Scratching nose and mouth                                                       |
| 2     | Swelling around the eyes and mouth; reduced activity; high breathing rate       |
| 3     | Shortness of breath; blue rash around the mouth and tail; higher breathing rate |
| 4     | No activity after stimulation; shivering and muscle contractions                |
| 5     | Death by shock                                                                  |

## Figures and Figure Legends

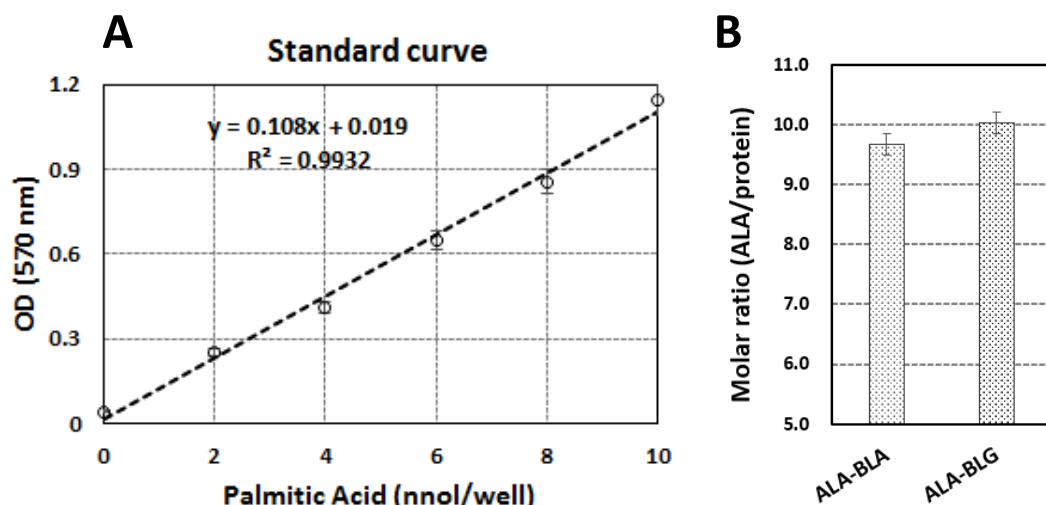

**FIGURE S1.** (A) The palmitic acid standard curve according to the Free Fatty Acid Quantification Kit protocol. Briefly, the samples were added to a 96-well plate in several dilutions. In parallel, a standard curve was prepared with known amounts of palmitic acid. FA assay buffer was added to each well to reach a final volume of 50  $\mu$ L. Acyl-CoA synthetase (2  $\mu$ L) was then added to each well to convert FA to their CoA derivatives, followed by incubation at 37°C for 30 min. A solution comprising enzymes, an enhancer, and a FA probe was added to each well to generate the color. After 30 min of incubation at 37°C in the dark, the absorbance was detected at 570 nm using an ELISA plate reader (Model 1860, Bio-Rad, USA). (B) The quantity of ALA remaining in ALA-BLA and ALA-BLG complexes after dialysis. Results are represented as means  $\pm$  SEM (n=2).

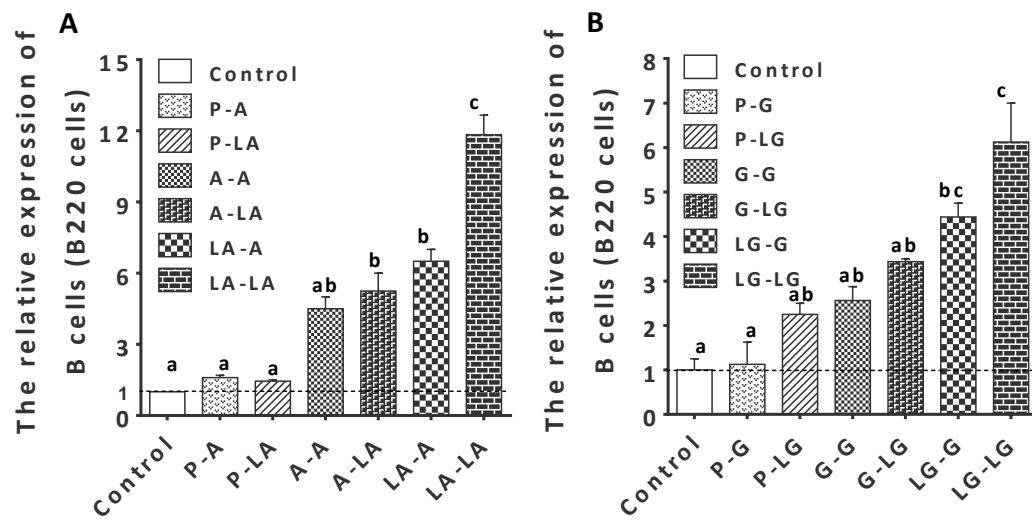

**FIGURE S2.** The relative expression of B220 cells from the mouse peripheral blood at 40 min after challenge. Values are expressed as means  $\pm$  SEM (n=2). Different letters indicate statistically significant differences.

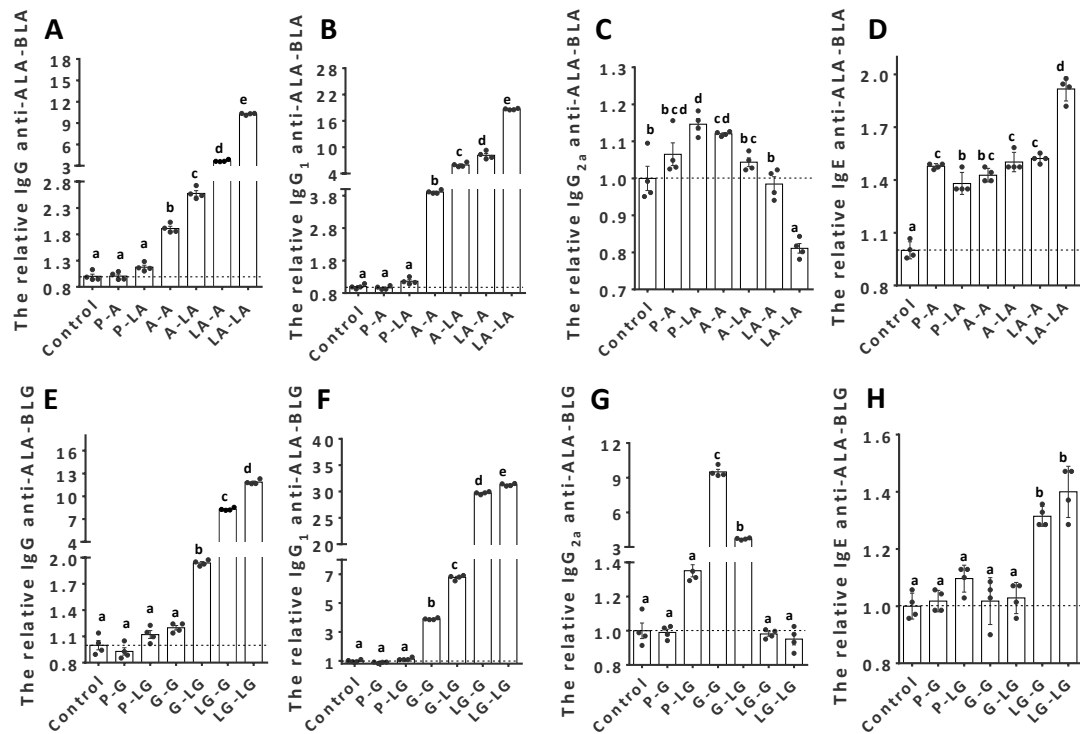

**FIGURE S3.** The relative antibodies levels from serum samples of mice determined by direct ELISA: ALA-BLA- and ALA-BLG-specific IgG (**A,E**), IgG<sub>1</sub> (**B,F**), IgG<sub>2a</sub> (**C,G**), and IgE (**D,H**) levels were measured in serum of sensitized and challenged mice with BLA, ALA-BLA, BLG, or ALA-BLG, respectively. Each point represented data from an individual mouse, and values are expressed as means  $\pm$  SEM (n=4). Different letters indicate statistically significant differences.

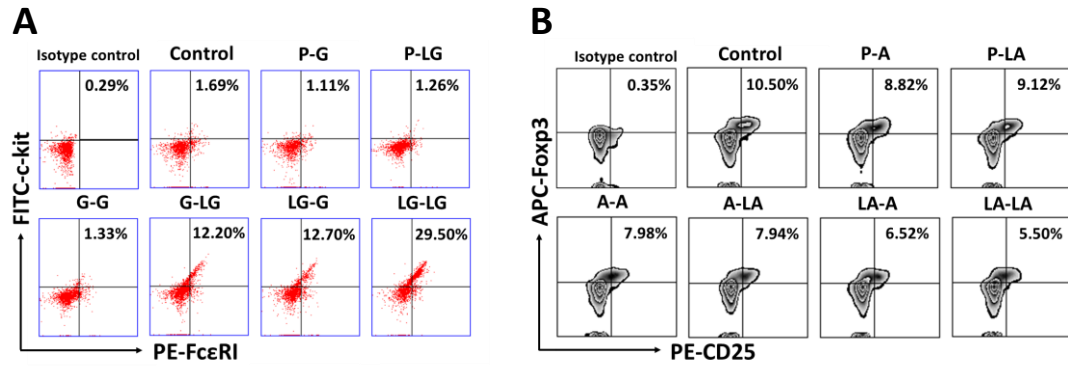

**Figure S4.** (A) Representative dot plots showing percentages of peritoneal FcεRI+c-kit<sup>+</sup> cells in the BLG groups; (B) representative percentages of CD25+Foxp3<sup>+</sup> cells after gating CD4<sup>+</sup> cells isolated from the spleen tissue of BLA groups.

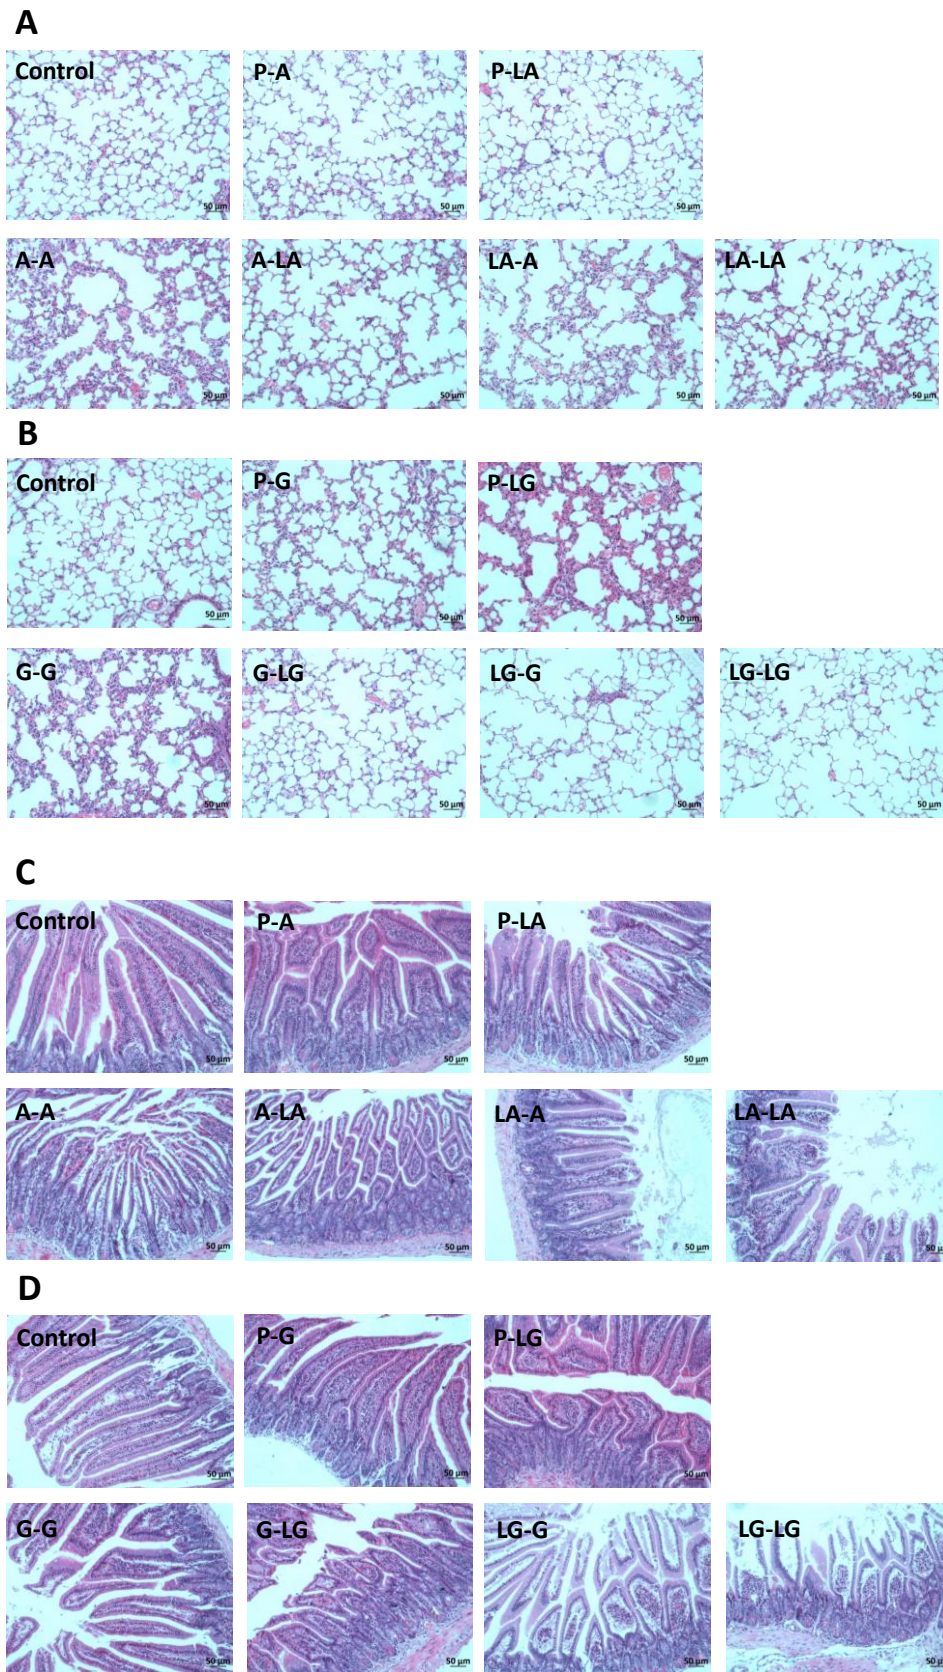

**FIGURE S5.** Histological sections (HE) of lung (**A,B**) and intestine (**C,D**) tissues from animals challenged by PBS, BLA, ALA–BLA, BLG, or ALA–BLG, respectively.
